# Supplementary material for: Construction of Two mCherry Plasmids (pXG-mCherry) for TransgenicLeishmania: Valuable Tools for Future Molecular Analysis
Source: Hindawi journal article supplement (doi:10.1155/2017/1964531), 2017-01-01
Supplement: f1 [file 1964531.f1.pdf]

1 **SUPPLEMENTARY FILE**

2

3 Construction of two mCherry plasmids (pXG-mCherry) for

4 transgenic *Leishmania*: valuable tools for future molecular

5 analysis

6

7 Andrés Vacas<sup>1,2</sup>, Conor Sugden<sup>1,2</sup>, Óscar Velasco-Rodríguez<sup>1,2</sup>, Miriam Algarabel-

8 Olona<sup>1,2</sup>, José Peña-Guerrero<sup>1,2</sup>, Esther Larrea<sup>1</sup>, Celia Fernández-Rubio<sup>1,2</sup>, Paul A.

9 Nguewa<sup>1,2#</sup>

10

11

12 <sup>1</sup> *Instituto de Salud Tropical (ISTUN). University of Navarra, Pamplona, Spain; IdiSNA,*

13 *Navarra Institute for Health Research*

14 <sup>2</sup> *Department of Microbiology and Parasitology, University of Navarra, Pamplona, Spain.*

15

16 **# Corresponding author:**

17 Paul Nguewa, PhD

18 E-mail: panguewa@unav.es

19

20 Molecular Parasitology, Therapeutic Targets and Drug Discovery. Instituto de Salud

21 Tropical (ISTUN). Department of Microbiology and Parasitology. University of Navarra.

22 Avda. Pio XII, 55. 31008 Pamplona, Spain.

## 23 **Material and methods**

24

### 25 **pXG-mCherry12 copies quantification**

26 Log-phase cultures of *L. major* WT, pXG-mCherry12 and pXG-mCherry12 recovered  
27 parasites, were counted using a Z1 Coulter counter (Beckman Coulter, Fullerton, CA,  
28 USA). Three samples containing  $10^8$  parasites from each culture were used for DNA  
29 extraction using a NucleoSpin® Tissue extraction kit (Macherey-Nagel, Germany)  
30 following manufacturer instructions. The standard curve was made from serial dilutions  
31 (1:10) of pXG-mCherry12 plasmid with a concentration of 391.9 ng/ $\mu$ l. The number of  
32 plasmid copies was calculated as previously described by Lee C. *et al.* (2005) [1]. 1 $\mu$ l of  
33 DNA from each sample were used in a 10  $\mu$ l reaction mix with 0.2  $\mu$ l of primers CHq-Fw  
34 (5'-cccgccgacatccccgacta) and CHq-Rv (5'-gggtcacggtcaccacgcc) (15 $\mu$ M), 5  $\mu$ l  
35 concentration of iQ™ SYBR® Green Supermix (Bio-Rad, California) and 3.6  $\mu$ l of  
36 autoclaved water. qPCR was executed with an Applied Biosystems 7500 Real-Time  
37 PCR System; results were analysed using manufacturer provided software.

38

### 39 **Flow cytometry analysis**

40  $10^6$  log-phase *L. major* WT, pXG-mCherry12 and pXG-mCherry12 recovered parasites,  
41 were fixed with a solution of 2% paraformaldehyde in PBS for 15 min at room  
42 temperature. Afterwards, cells were washed twice and re-suspended in a final volume of  
43 500  $\mu$ l of PBS.

44 Data acquisition was performed with a BD FACSaria III (Becton Dickinson)  
45 equipped with 488nm, 561 nm and 633 nm laser lines and BD FACSDiva Software

46 (Becton Dickinson). mCherry was excited with a 561nm laser line and captured with a  
47 610/20 BP filter. FSC/SSC signals were acquired on linear amplification and  
48 fluorescence signals with logarithmic amplification. Event Rate was 150-200  
49 events/second. Before acquisition quality control was done using CST beads according  
50 with manufacturer instructions.

51 Analyses were done on singlets, excluding debris on FSC/SSC and doublets with  
52 BD FACSDiva (Becton Dickinson), or FlowJo software (TreeStar). More than 20,000  
53 events were analysed for each test. Negative controls were used to set the negative  
54 boundaries and establish the positive populations.

55 The Fluorescence intensities were reported in arbitrary units as MFI (Median  
56 Fluorescence Intensity), or in the whole population singlets. The percentages of  
57 mCherry+ cells on singlets were also reported.

58

### 59 **BMM (Bone Marrow-derived Macrophages) isolation and amastigotes** 60 **fluorescence quantification**

61 Cells from femurs and tibias from BALB/c mice were differentiated into macrophages for  
62 8 days using DMEM (Gibco Laboratories, Grand Islands, USA) supplemented with  
63 5µg/ml penicillin, 100 U/ml streptomycin 10% fetal bovine serum and L-929-conditioned  
64 medium, following the procedure previously described by Van den Bossche *et al.* (2015)  
65 [2]. BMMs (Bone Marrow-derived Macrophages) were counted using a Neubauer  
66 chamber and re-suspended in DMEM medium. Then, 20,000 cells were seeded per well  
67 in black 96-well plates with clear bottom. 24 h after, PNA-isolated metacyclic pXG-  
68 mCherry12 parasites were added to each well at different concentrations to achieve four

69 infection ratios: 1:12, 1:25, 1:50 and 1:100. Infections were synchronized by  
70 centrifugation (330 xg, 3 min at 4 °C) and plates were incubated for 24 h at 37°C with  
71 5% CO<sub>2</sub>. Finally, plates were washed three times with warm PBS and fluorescence was  
72 quantified using a BMG FLUOstar Optima microplate reader as previously described.

73

#### 74 **Fluorescence quantification of Hygromycin-free medium (HFM) cultures**

75 pXG-mCherry12 parasites were washed twice with Hygromycin-free complete M199  
76 medium (without phenol-red) to remove Hygromycin (the selection antibiotic). Then,  
77 cultures were grown for 7 and 60 days at 26°C in Hygromycin-Free Medium (HFM).  
78 After 60 days, a subculture was made and grown in medium supplemented with  
79 hygromycin. Fluorescence was measured spectrofluorometrically as previously  
80 described, at different conditions: a) 7 and 60 days in HFM; and b) 60 days in HFM and  
81 then in Hygromycin-supplemented medium).

82

83 **Results**

84

85 **pXG-mCherry12 plasmid copies quantification and flow cytometry analysis**

86 We have quantified the copy number of our clone by absolute qPCR using the standard  
87 curve method ( $R^2=0.9968$ ). We analysed the copy number from two different samples  
88 already reported in the manuscript: **a)** the fluorescent cells obtained after colony  
89 selection from agar plates (**pXG-mCherry12 parasites**); **b)** pXG-mCherry12 parasites  
90 grown *in vitro*, PNA-selected and used to infect animals (*in vivo* assays), and the  
91 subsequent cells obtained from the culture derived from the *in vivo* infections (**pXG-**  
92 **mCherry12 recovered parasites**). Therefore, the recovered parasites were maintained  
93 60 days in our Lab (compared to the pXG-mCherry12).

94 As shown in **Supplementary Figure S1B** and **Supplementary Table S1**, the  
95 number of copies from the recovered parasites was similar to that detected in pXG-  
96 mCherry12 parasites. These data demonstrated that there was no change in the  
97 number of copies of the plasmid after 60 days.

98

99

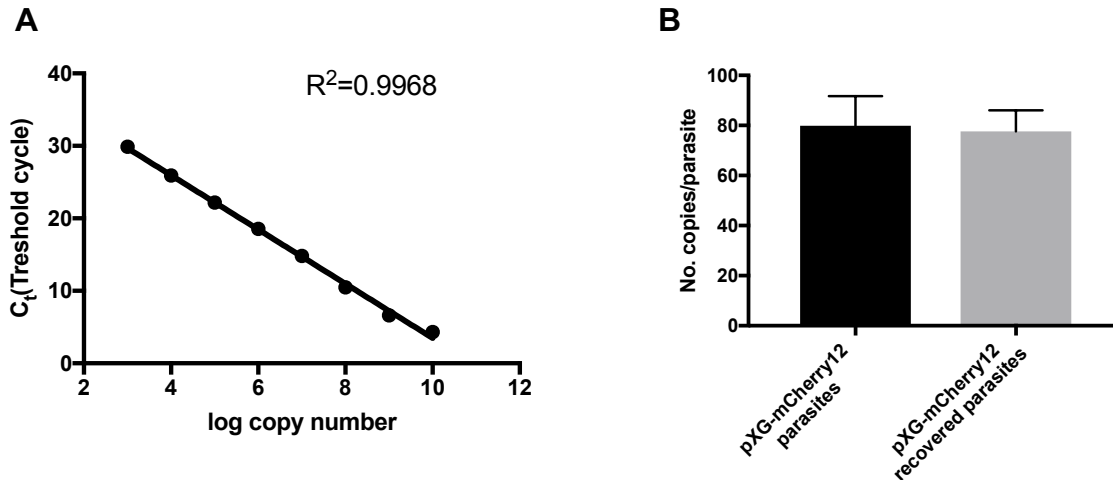

100

101 **Figure S1.** pXG-mCherry12 plasmid quantification by absolute qPCR. **A)** Plasmid copies standard curve  
 102 ( $R^2=0.9968$ ). **B)** Plasmid copies per parasite from each analysed sample (pXG-mCherry12 recovered  
 103 parasites and pXG-mCherry12 parasites). Bars indicate the mean ( $\pm$  SEM).

104

105 **Table S1.** pXG-mCherry12 copies per parasite, measured by absolute qPCR ( $R^2=0.9968$ ).

| Culture                           | Copies <sup>a</sup> (copies/parasite) |
|-----------------------------------|---------------------------------------|
| pXG-mCherry12 parasites           | 79.90 $\pm$ 11.85                     |
| pXG-mCherry12 recovered parasites | 77.66 $\pm$ 8.35                      |

106 <sup>a</sup> Mean  $\pm$  SEM (n=3)

107

108 We further analysed the fluorescence from these samples by Flow Cytometry  
 109 technique (**Supplementary Figure S2A**). Cultures populations harbouring episomal  
 110 reporter displayed heterogeneous fluorescence intensity (**Supplementary Figure S2A**)  
 111 as already described by Calvo-Álvarez *et al.* (2012) [3]. A decrease in the median  
 112 fluorescence intensity (MFI) of the parasites recovered from mouse tissue was  
 113 observed (**Supplementary Figure S2B**). In addition, the percentage of mCherry+ cells  
 114 did not vary in both populations (85.6% for pXG-mCherry12 parasites and 85.3% for  
 115 pXG-mCherry12 recovered parasites).

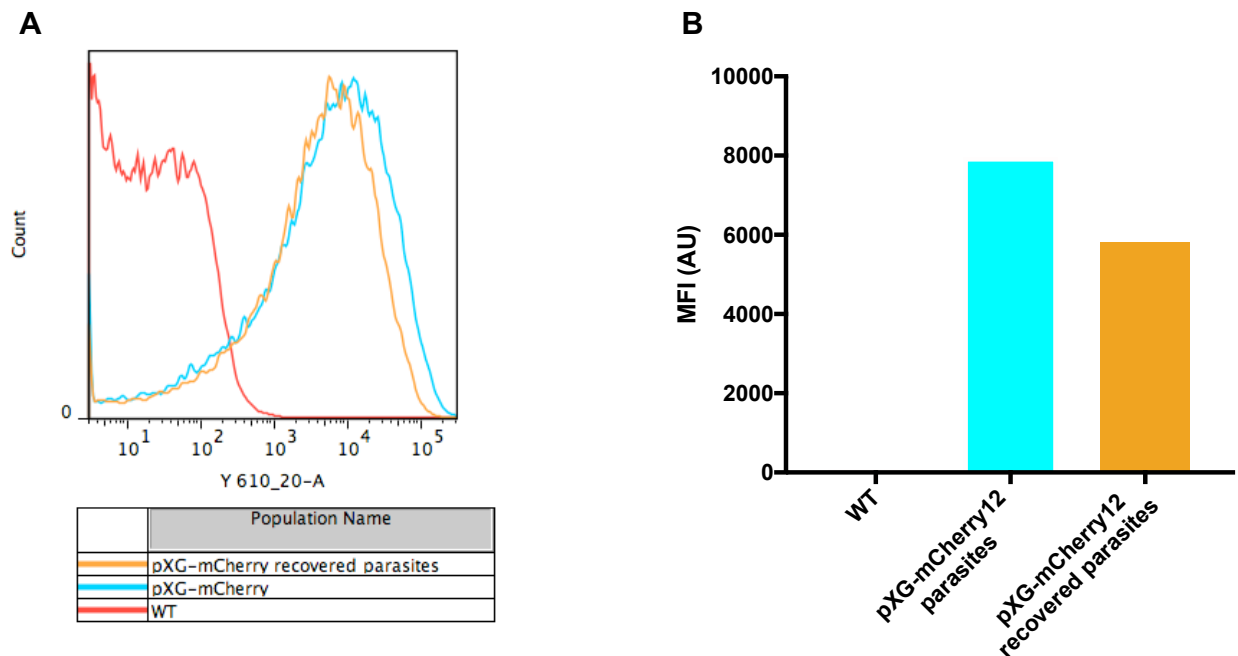

117

118 **Figure S2. Analysis of the fluorescence by Flow Cytometry.** A) Histogram plot representative of  
 119 distribution of mCherry fluorescence levels in different populations. B) Median Fluorescence Intensity  
 120 (MFI) of the WT, pXG-mCherry12 and pXG-mCherry12 recovered parasites.

121

## 122 Amastigotes fluorescence quantification

123 The red fluorescence of our plasmids was maintained **during *in vitro*** and after *in vivo*  
 124 infections. As presented in **Figure 4A**, *Leishmania major* amastigotes harbouring pXG-  
 125 mCherry12 (pXG-mCherry12 amastigotes) exhibited red-fluorescence inside murine  
 126 peritoneal macrophages. On the other hand, **Figure S3** shows additional evidence of  
 127 the fluorescence emission generated by pXG-mCherry12 amastigotes after *in vitro*  
 128 BMM (Bone Marrow-derived Macrophages) infections. Interestingly, an increase of the  
 129 infection ratio (macrophage:amastigotes= 1:12, 1:25, 1:50 and 1:100) also produced a  
 130 higher fluorescence intensity.

131

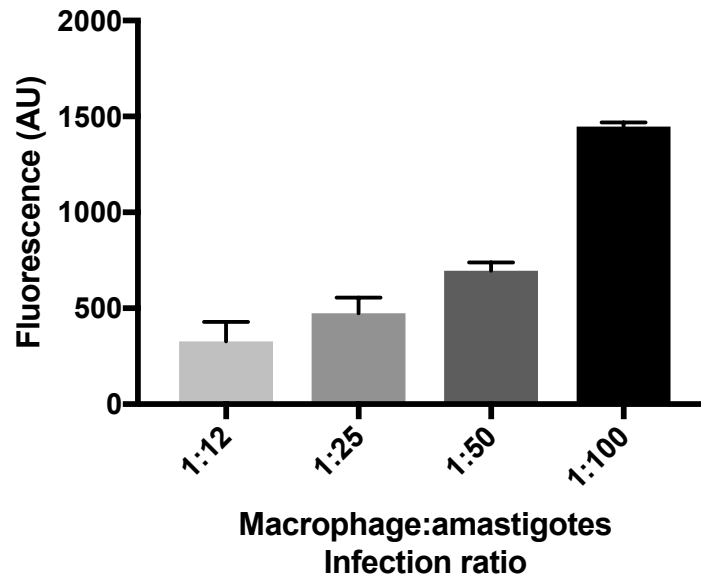

132

133 **Figure S3.** Mean fluorescence intensity emitted by amastigotes within macrophages. The fluorescence  
134 was expressed as arbitrary units (AU). 20,000 Bone Marrow-derived Macrophages (BMM) per well were  
135 seeded in a 96-well plate and infected with 4 different macrophage:amastigote ratios (1:12, 1:25, 1:50 and  
136 1:100). Fluorescence was quantified using a BMG FLUOstar Optima microplate reader with 570/620 nm  
137 laser filters. Bars indicate the mean fluorescence ( $\pm$  SD).

138

### 139 **mCherry fluorescence kinetics in Hygromycin free medium**

140 We have conducted fluorescence intensity analysis. The values obtained under different  
141 conditions (Hygromycin-free medium, -HFM-; Hygromycin addition after 60 days in  
142 HFM) were compared to data previously measured from pXG-mCherry12 parasites  
143 grown in medium with hygromycin (**Supplementary Fig S4**). In fact, as shown in  
144 **Supplementary Figure S4**, a good correlation ( $R^2=0.9999$ ) was observed between the  
145 number of pXG-mCherry12 parasites grown in medium with hygromycin and  
146 fluorescence intensity.



147 We then analysed red-fluorescence emission of pXG-mCherry12 parasites after  
148 both, short- (7 days) and long-term (60 days) culture in Hyg-free medium (HFM). Our  
149 data indicated that after 7 days cultured in HFM, no loss in fluorescence was  
150 appreciated when compared to controls (pXG-mCherry12 parasites grown in medium  
151 with hygromycin) (**Supplementary Figure S4A**).

152 We further studied fluorescence intensity when cultured in HFM for a longer time (60  
153 days). As expected for antibiotic-dependent expression plasmid such as pXG, after 60  
154 days of cultivation in HFM, parasites fluorescence reduction was detected  
155 (**Supplementary Figure S4A**). However, once in presence of Hygromycin, such cells  
156 were *de novo* able to emit fluorescence at the same level as controls (**Supplementary**  
157 **Figure S4B**). In fact, as observed in **Supplementary Figure S4B**, when parasites  
158 previously grown in HFM during 60 days were exposed to Hygromycin, the correlation  
159 between the number of these parasites and fluorescence intensity was high  
160 ( $R^2=0.9971$ ) and the curve was similar to that of controls (**Supplementary Figure S4B**).

161 On the other hand, a similar trend was observed in promastigotes recovered from  
162 mouse tissue (pXG-mCherry12 recovered parasites) (**Supplementary Figure S4B**).  
163 This result (fluorescence recovery) is in accordance with the data reported in our  
164 manuscript (**Figure 4B**). Parasites obtained from *in vivo* infections recovered their initial  
165 fluorescence intensity after Hygromycin was added to the culture medium, the same  
166 way as parasites cultured in HFM recovered their fluorescence when Hygromycin was  
167 added (**Supplementary Figure S4B**).

168 Finally, the aforementioned observations were confirmed by microscopy  
169 (**Supplementary Figure S5**). As previously described, when pXG-mCherry12 parasites

170 were grown in Hygromycin-supplemented medium, red fluorescence emission was  
171 detected. Whereas, after pXG-mCherry12 parasites were cultured for 60 days in HFM,  
172 the fluorescence intensity decreased. On the contrary, after pXG-mCherry12 cells were  
173 grown in HFM (60 days) and then in Hygromycin-supplemented medium, the  
174 fluorescence intensity was recovered.

175 All together, these results suggest the stability of the plasmid within the parasite for a  
176 short period of time in HFM. Although such fluorescence intensity was reduced after  
177 long-term cultivation in HFM, our data demonstrated that it can be *de novo* recovered  
178 after adding hygromycin in the medium.

179

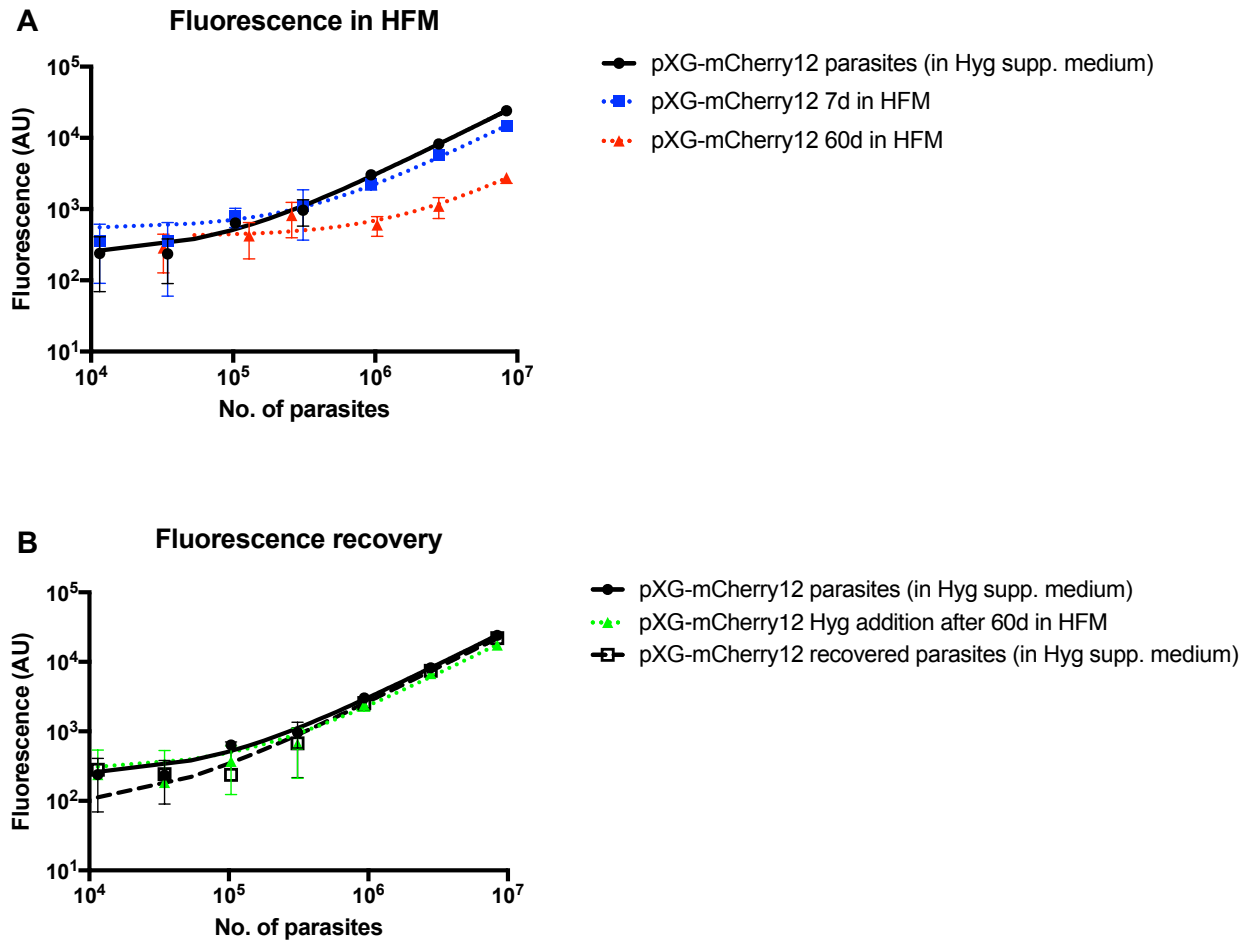

181

182 **Figure S4.** Fluorescence intensity of pXG-mCherry12 parasites was measured under different conditions  
 183 (Hygromycin-free medium, -HFM- during 7 and 60 days; Hygromycin addition after 60 days in HFM) and  
 184 compared to control (data previously measured from pXG-mCherry12 parasites grown in hygromycin  
 185 medium,  $R^2=0.9999$ ). **A)** Fluorescence emitted from pXG-mCherry12 promastigotes cultured for 7 or 60  
 186 days in HFM ( $R^2=0.9985$  and  $0.9639$ , respectively). **B)** Fluorescence when cultured in HFM for a longer  
 187 time (60 days) and then in Hygromycin supplemented-medium ( $R^2=0.9971$ ). A similar trend was observed  
 188 in promastigotes recovered from mouse tissue (pXG-mCherry12 recovered parasites). Serial dilutions in  
 189 96-well plates were read with a FLUOstar Optima plate reader using 570-nm excitation and 620-nm  
 190 absorbance filters.

191

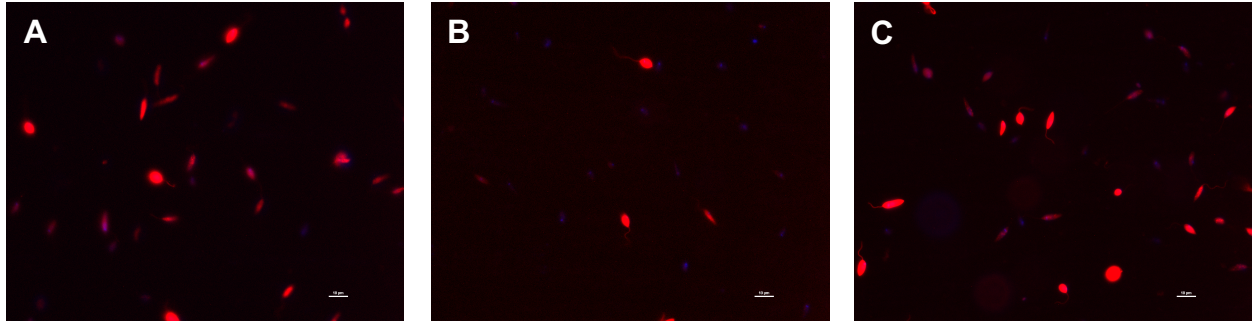

192

193 **Figure S5.** Detection of red fluorescent parasites by confocal microscopy. **A)** pXG-mCherry12  
194 parasites were grown in Hygromycin-supplemented medium and the red fluorescence emission was  
195 detected. **B)** When pXG-mCherry12 parasites were cultured for 60 days in Hygromycin-free medium, the  
196 fluorescence intensity decreased. **C)** On the contrary, after pXG-mCherry12 cells were grown in HFM (60  
197 days) and then in Hygromycin-supplemented medium, the fluorescence intensity was recovered.

198

## 199 **References**

- 200 1 Lee, C., Kim, J., Shin, S.G. and Hwang, S. (2006) Absolute and Relative QPCR  
201 Quantification of Plasmid Copy Number in *Escherichia coli*. *Journal of biotechnology*,  
202 **123**, 273–280. <http://dx.doi.org/10.1016/j.jbiotec.2005.11.014>.
- 203 2 Van den Bossche, J., Baardman, J. and de Winther, M.P.J. (2015) Metabolic  
204 Characterization of Polarized M1 and M2 Bone Marrow-Derived Macrophages Using  
205 Real-Time Extracellular Flux Analysis. *Journal of visualized experiments: JoVE*.  
206 <http://dx.doi.org/10.3791/53424>.
- 207 3 Calvo-Álvarez, E., Guerrero, N.A., Alvarez-Velilla, R., Prada, C.F., Requena, J.M.,  
208 Punzón, C., Llamas, M.Á., Arévalo, F.J., Rivas, L., Fresno, M., Pérez-Pertejo, Y.,  
209 Balaña-Fouce, R. and Reguera, R.M. (2012) Appraisal of a *Leishmania major* Strain  
210 Stably Expressing mCherry Fluorescent Protein for Both in Vitro and in Vivo Studies  
211 of Potential Drugs and Vaccine Against Cutaneous Leishmaniasis. Milon, G., Ed.,

212 *PLoS Neglected Tropical Diseases*, **6**, e1927.

213 <http://dx.doi.org/10.1371/journal.pntd.0001927>.

214
